# Supplementary material for: A Putative Novel Hepatitis E Virus Genotype 3 Subtype Identified in Rabbit, Germany 2016
Source: MDPI journal article supplement (doi:10.3390/v13061065), 2021-06-03
Supplement: s1 [file s1]

Table S1 : Primers used for HEV RNA quantification, genotyping, and genome sequencing

| Name           | Sequence                             | nucleotide position* | use               | Reference                   |
|----------------|--------------------------------------|----------------------|-------------------|-----------------------------|
| JVHEVR         | AGGGGTTGGTTGGATGAA                   | 5348 - 5331          | qPCR              | Jothikumar et al., 2006     |
| JVHEVF         | GGTGGTTTCTGGGGTGAC                   | 5279 - 5926          | qPCR              | Jothikumar et al., 2006     |
| JVHEV.P81      | TGATTCTCAACCCCTTCGC                  | 5302 - 5319          | qPCR              | this work                   |
| JVHEV.P        | TGATTCTCAGCCCTTCGC                   | 5302 - 5319          | qPCR              | Jothikumar et al., 2006     |
| HEV.R          | GCGAAGGGGTTGGTTGGATG                 | 5325 - 5333          | RT-PCR/Sequencing | Vina-Rodriguez et al., 2015 |
| HEV.RdRp_F2b   | GTGCTCTGTTTGGCCNTGGTTYMG             | 4280 - 4304          | RT-PCR/Sequencing | Hammerschmidt et al., 2017  |
| R5674          | TGAGTGTGGTGCCGTCCTG                  | 5685 - 5666          | Sequencing        | this work                   |
| R5625          | CATACAAGACAAGATTAGTGCC               | 5636 - 5615          | RT-PCR/Sequencing | this work                   |
| F5086          | GGACCTTACAAATTCTATTATACAG            | 5094 - 5118          | Sequencing        | this work                   |
| F5048          | GGCAAGGCTCACTTTACCGA                 | 5056 - 5075          | RT-PCR/Sequencing | this work                   |
| AAP mod        | GGCCACGCGTCGACTAGTACGGGGGGGGGGGGGGGG | RACE adapter         | Sequencing        | ThermoFisher (adapted)      |
| AP             | GGCCACGCGTCGACTAGTACTTTTTTTTTTTTTTTT | RACE adapter         | Sequencing        | ThermoFisher                |
| AUAP           | GGCCACGCGTCGACTAGTAC                 | RACE adapter         | Sequencing        | ThermoFisher                |
| R6591          | GAAAATGGTCTGATCGTACTC                | 6622 - 6602          | RT-PCR/Sequencing | this work                   |
| R6578          | GAGAGCCACAACACATCATT                 | 6588 - 6569          | Sequencing        | this work                   |
| R5926          | CCTGGTTACGATAATGGAGG                 | 5936 - 5917          | Sequencing        | this work                   |
| R2429          | CACAATCCGACTCGAATAAGG                | 2449 - 2429          | Sequencing        | this work                   |
| K081.RACE5'700 | GACAACCTACGCGACTTCCATC               | 684 - 664            | Sequencing        | this work                   |
| K081.RACE5'400 | CGCGAGTTGGGGCAGAGTAC                 | 400 - 381            | Sequencing        | this work                   |
| K081.RACE3'300 | GGCCCTGTGTCCATTCTGC                  | 6938 - 6957          | Sequencing        | this work                   |
| F5906          | CCTCCATTATCGTAACCAGG                 | 5917 - 5936          | RT-PCR/Sequencing | this work                   |
| F1610          | CTTGAGGCCCTTTATAGTGC                 | 1609 - 1628          | Sequencing        | this work                   |
| R6506          | GTCTGTTCATGTTGATTGTCTG               | 6517 - 6496          | RT-PCR/Sequencing | this work                   |
| R3157          | CAGCAAATGCGGTGGTAATGAC               | 3165 - 3144          | Sequencing        | this work                   |
| F6485          | CGACAATCAACATGAACAGGAC               | 6496 - 6517          | RT-PCR/Sequencing | this work                   |
| F5305          | CCTTCGCCCTCCCCTATATTC                | 5313 - 5333          | RT-PCR/Sequencing | this work                   |
| F960           | CATTCCACGCAGTCCCAGTTC                | 959 - 979            | Sequencing        | this work                   |
| R1042          | CGAGCAACAAAAGGCCTGATC                | 1041 - 1021          | Sequencing        | this work                   |
| R725           | CATCATGGTTATACCCTGCACTAG             | 724 - 701            | Sequencing        | this work                   |
| F2991          | CTATCCAGCAGGGGGATGTTG                | 2999 - 3019          | RT-PCR/Sequencing | this work                   |
| F705           | GTGCAGGGTATAACCATGATG                | 704 - 724            | Sequencing        | this work                   |
| F32            | GAGGCCCATCAGTTTATTAAGG               | 31 - 52              | RT-PCR/Sequencing | this work                   |
| terR           | CTCCCGGTYTTRCCTACCYTC                | 7144 - 7123          | RT-PCR/Sequencing | this work                   |
| 4R             | CACATAAAATGTTTTAGAAATGC              | 6781 - 6760          | Sequencing        | this work                   |
| 3R             | CATAAGACCATTGAATCATCTC               | 4718 - 4697          | RT-PCR/Sequencing | this work                   |
| 3F             | GAGATGATTCAATGGTCTTATG               | 4697 - 4718          | Sequencing        | this work                   |
| 2R             | GCCGTAGCAATAATAGTAGTC                | 3518 - 3498          | RT-PCR/Sequencing | this work                   |
| 2F             | GACTACTATTATTGCTACGGC                | 3498 -3518           | Sequencing        | this work                   |

\*numbering according to MT920909

a

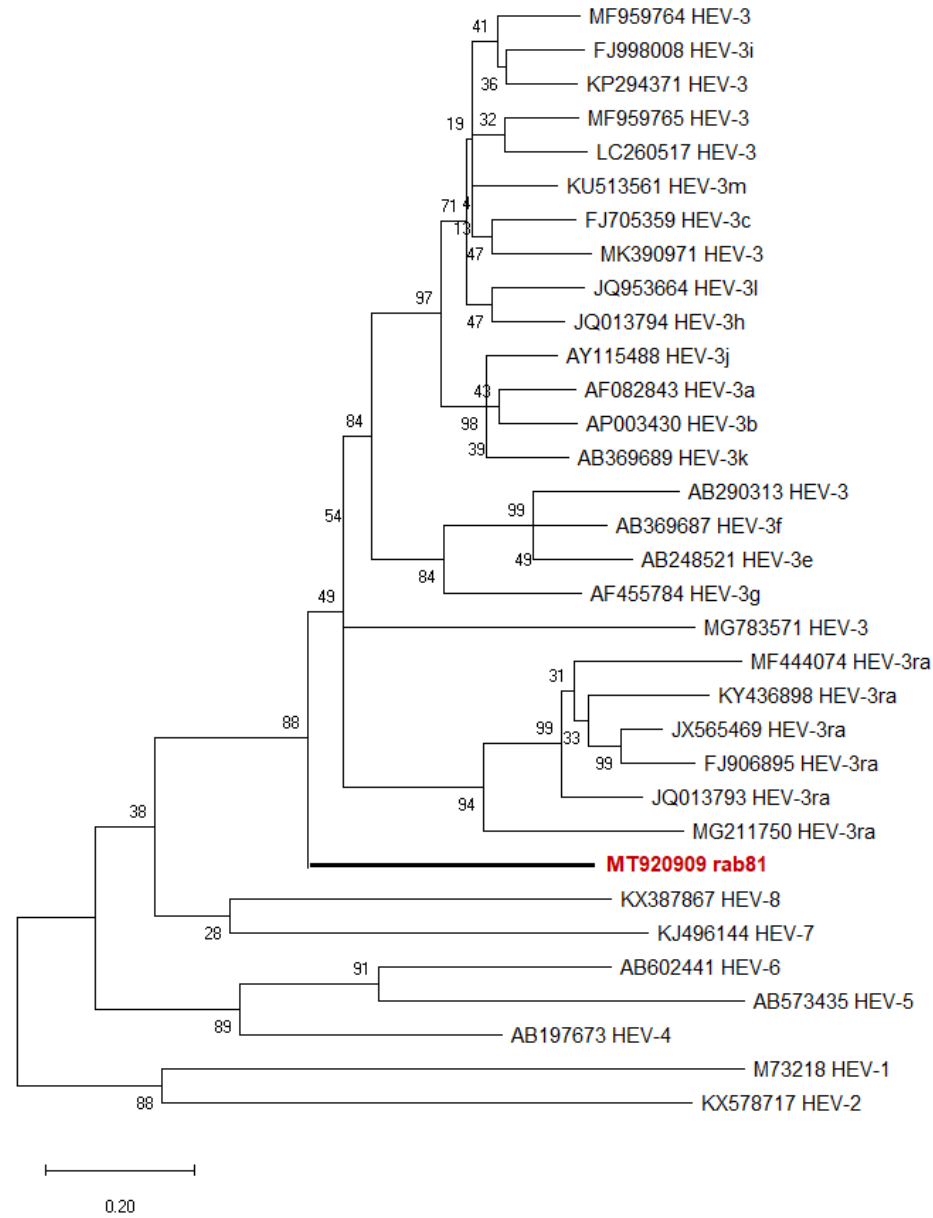

b

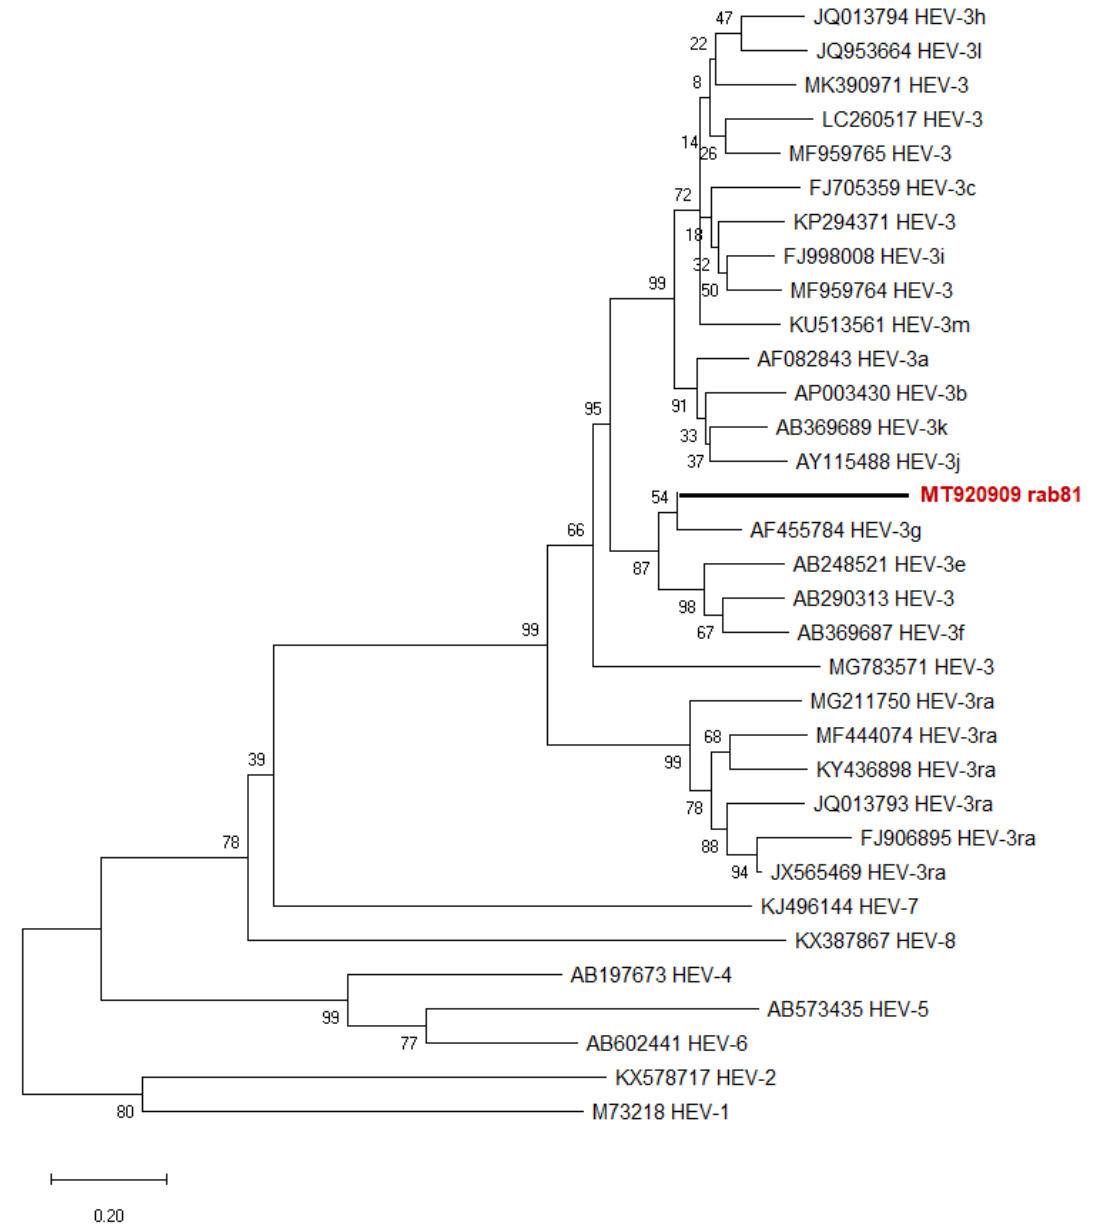

Figure S1: Molecular phylogenetic analysis of seven partial HEV sequences (a-g) as determined by SimPlot analysis

c

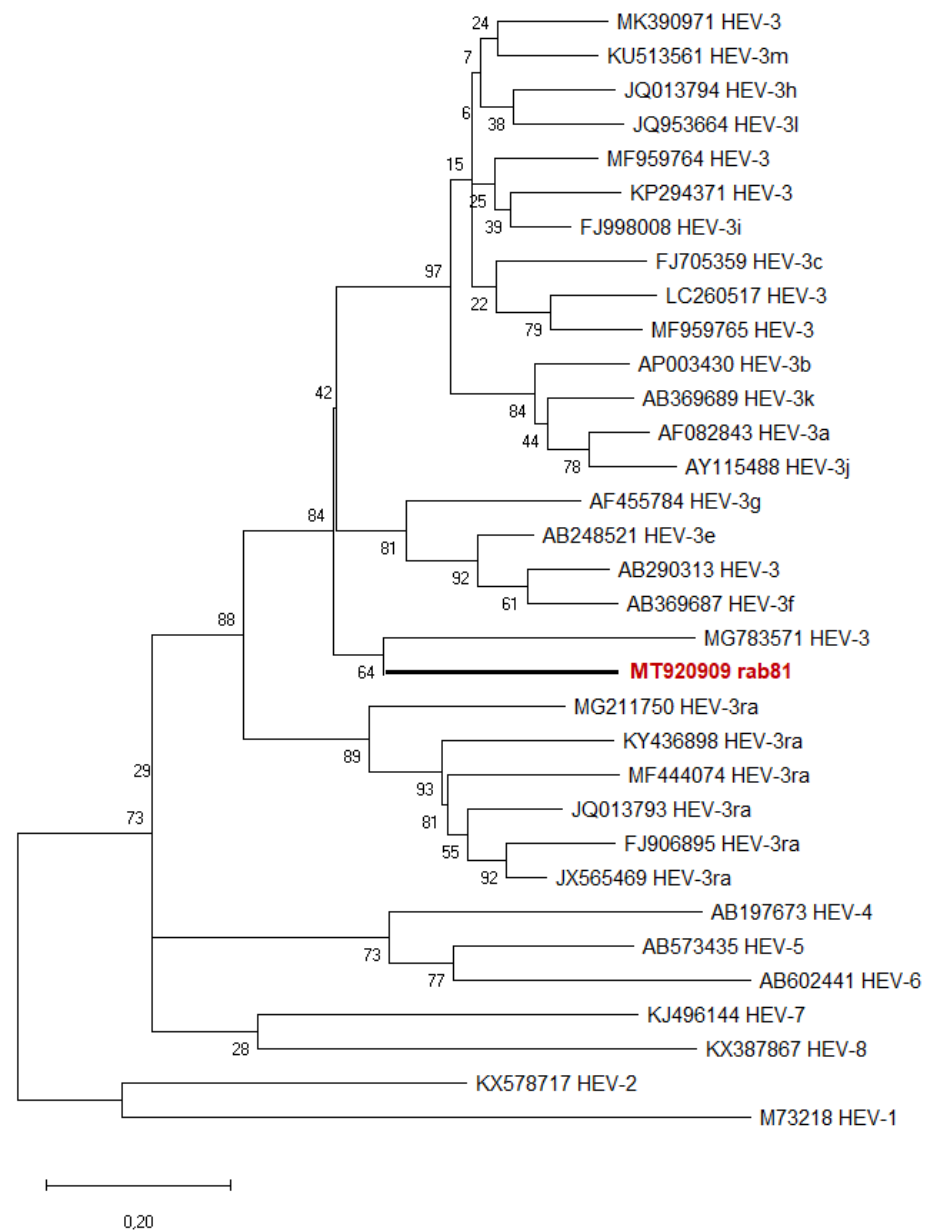

d

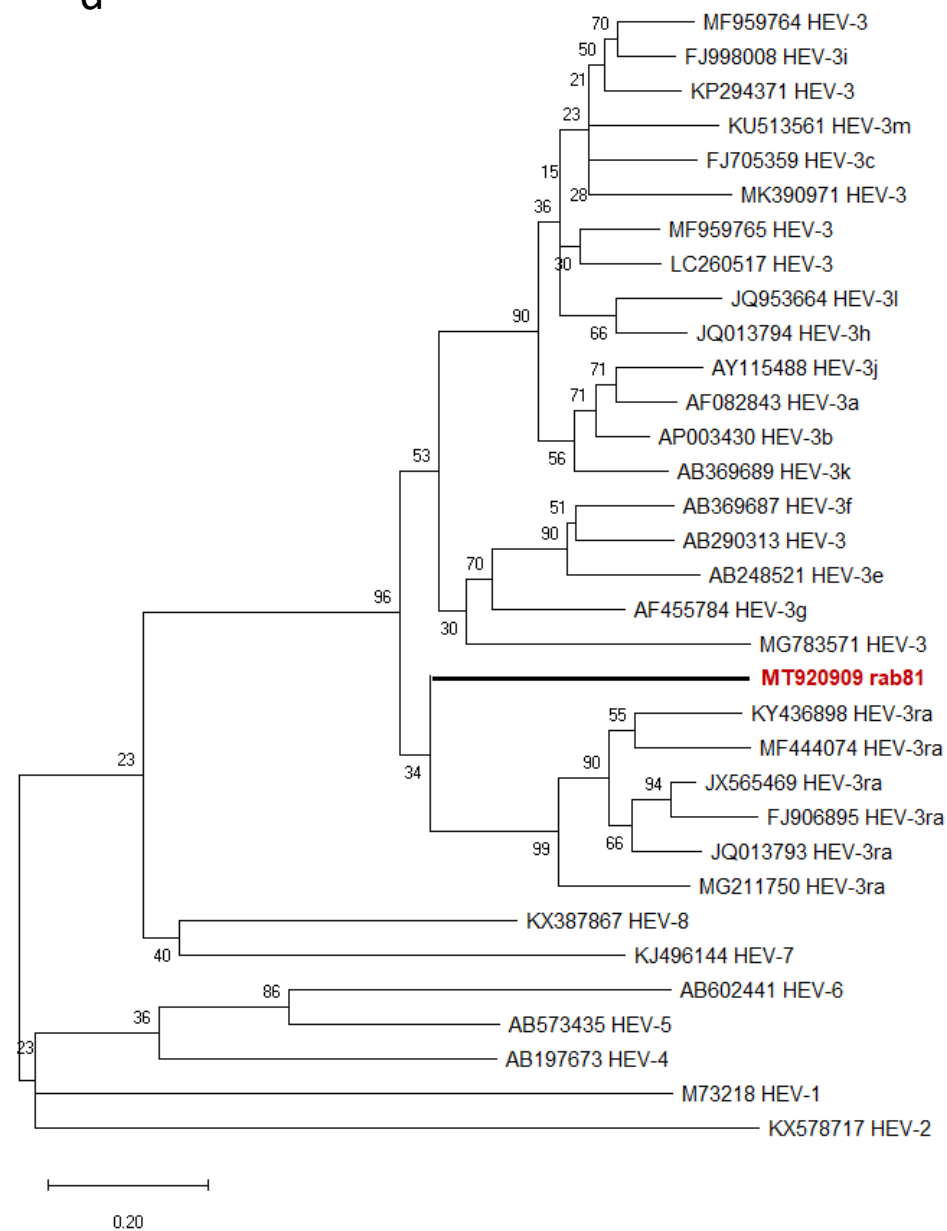

e

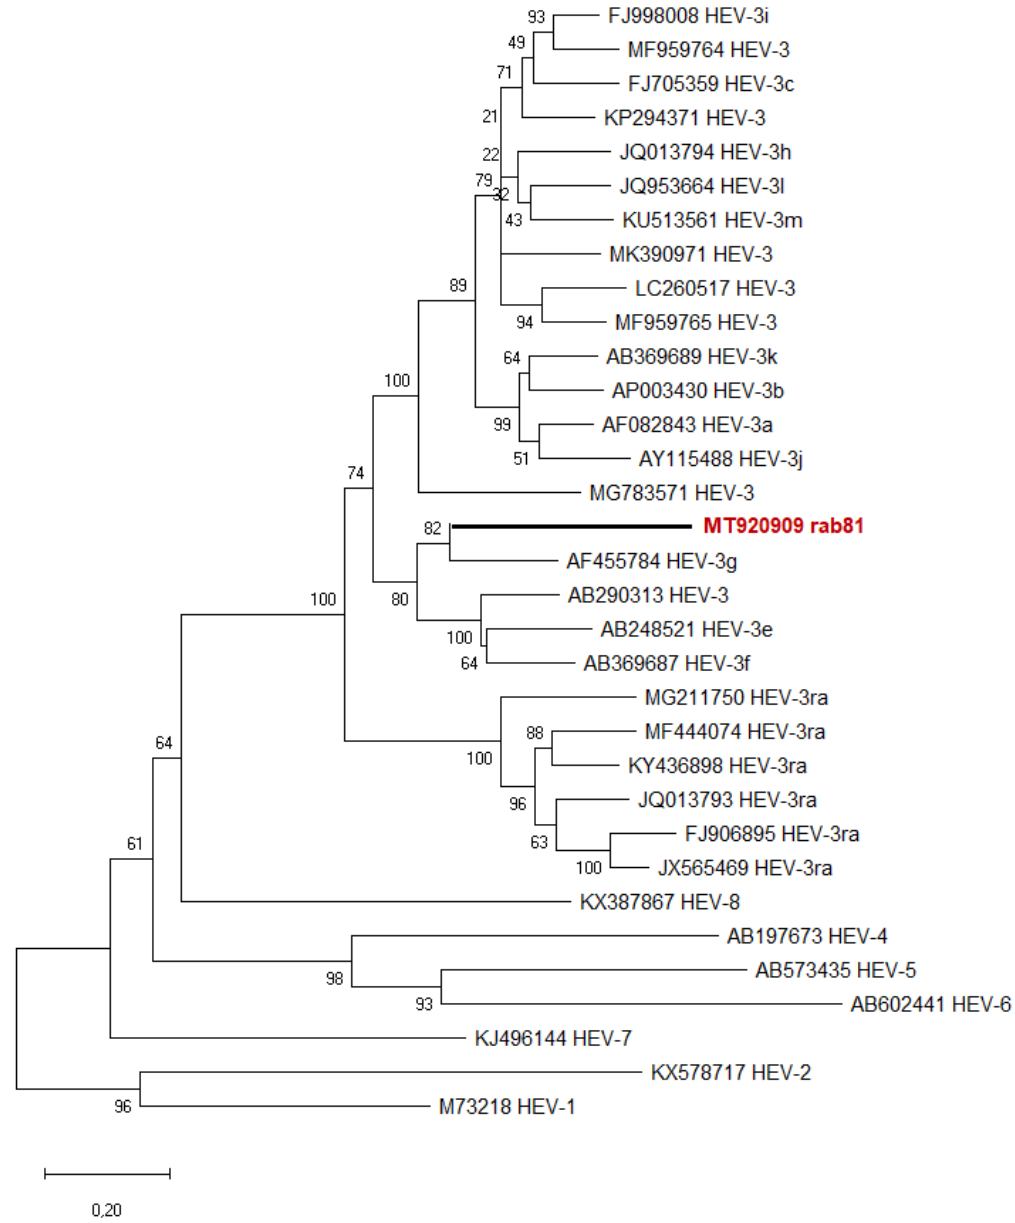

f

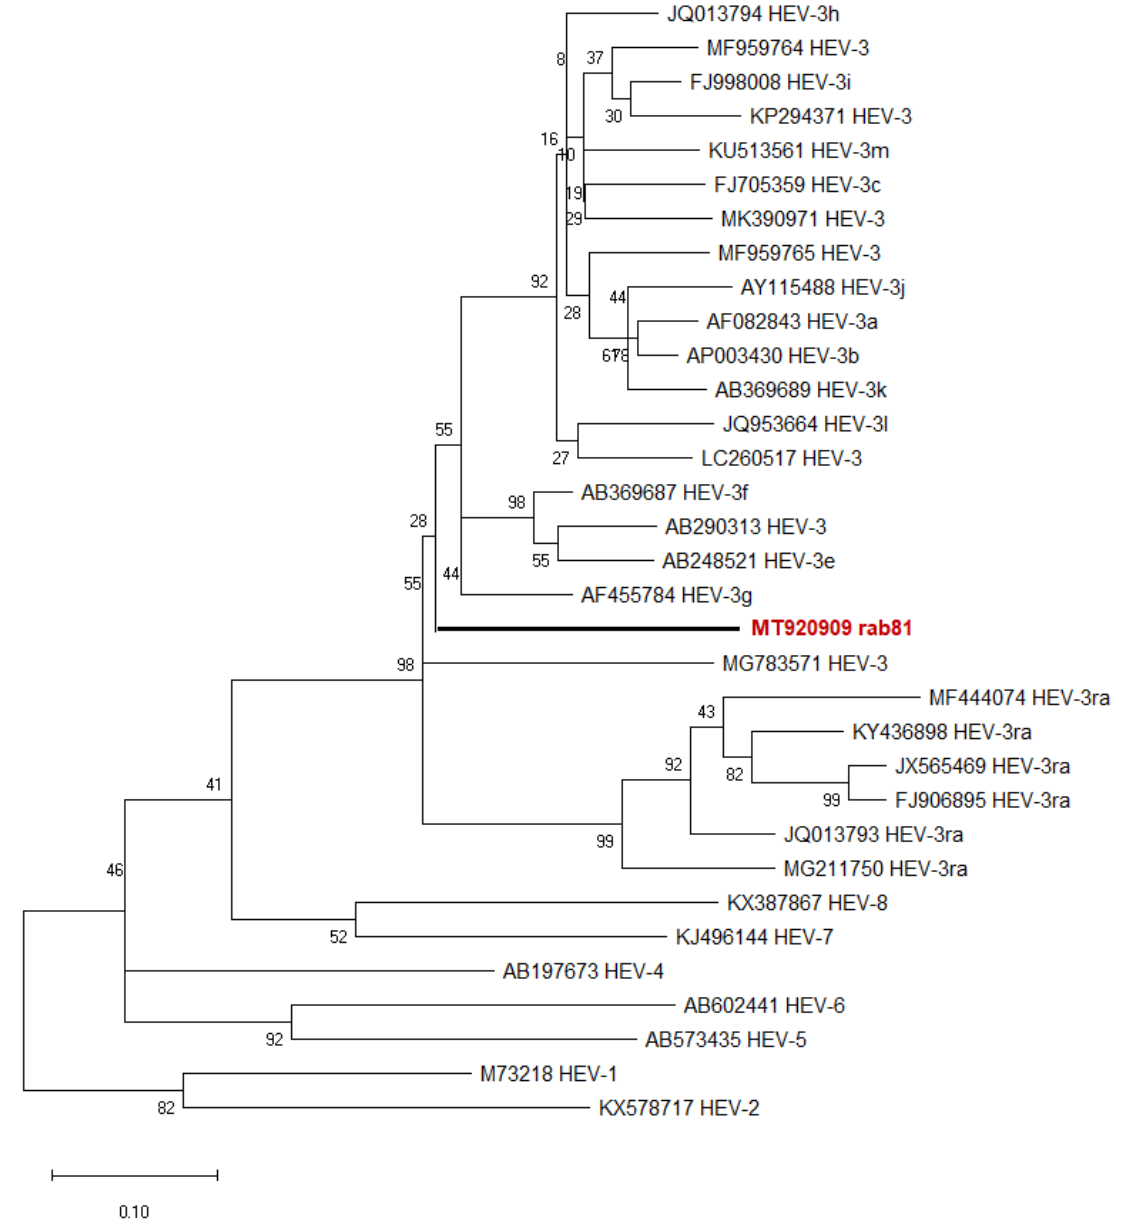

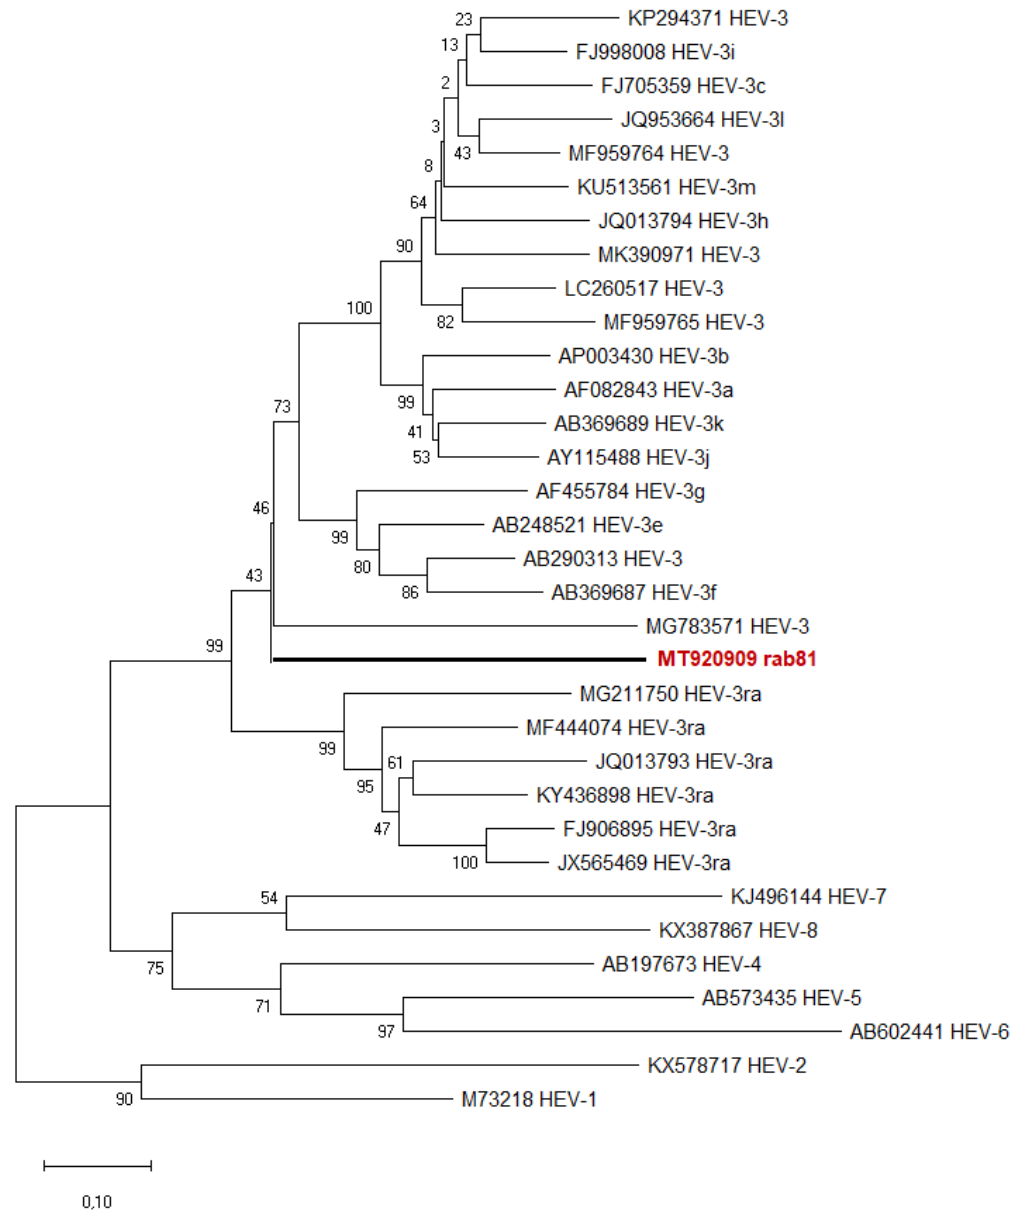

b

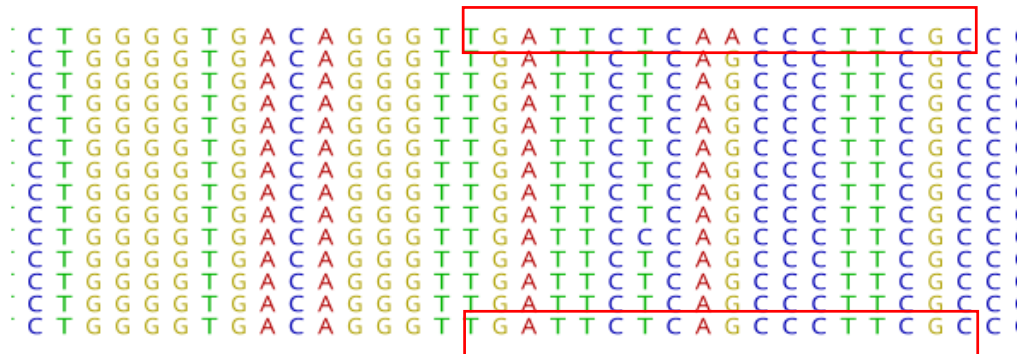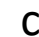

|           | ct value (average of three) |                |
|-----------|-----------------------------|----------------|
| dilution  | adapted probe               | original probe |
| $10^{-3}$ | 30.9                        | 33.4           |
| $10^{-4}$ | 26.3                        | 29.2           |
| $10^{-5}$ | 22.0                        | 24.3           |

Figure S2: Nucleotide sequence alignment of quantitative real-time RT-PCR (qRT-PCR) probe target region (a), qRT-PCR runs (triplicate) at three dilution steps (b) and bean ct-values yielded by original probe or adapted probe (c)
